# Supplementary material for: Consumer Preference for Food Bundles under Cognitive Load: A Grocery Shopping Experiment
Source: Foods. 2022 Mar 27;11(7):973. doi: 10.3390/foods11070973 (PMC8997493; doi:10.3390/foods11070973)
Supplement: Supplementary file 1 [file foods-11-00973-s001.zip › foods-1619753-supplementary.pdf]

**Table S1.** Order of Grocery Shopping Experiment Tasks

| Task                                     | Sub-Task                                                                                                                                                                                                                                                                                                                                                                                                                                                                                                                       |
|------------------------------------------|--------------------------------------------------------------------------------------------------------------------------------------------------------------------------------------------------------------------------------------------------------------------------------------------------------------------------------------------------------------------------------------------------------------------------------------------------------------------------------------------------------------------------------|
| 1. Obtain informed consent               |                                                                                                                                                                                                                                                                                                                                                                                                                                                                                                                                |
| 2. Review session instructions           |                                                                                                                                                                                                                                                                                                                                                                                                                                                                                                                                |
| 3. Practice tasks:                       | <ul style="list-style-type: none"> <li>i. Food shopping practice</li> <li>ii. 7-Digit number memorization and recall practice<sup>1</sup></li> <li>iii. Arithmetic practice</li> </ul>                                                                                                                                                                                                                                                                                                                                         |
| 4. View all products in grocery display  |                                                                                                                                                                                                                                                                                                                                                                                                                                                                                                                                |
| 5. Food shopping tasks <sup>2</sup>      | <ul style="list-style-type: none"> <li>i. Food Shopping Section (2 tasks):<sup>3</sup> <ul style="list-style-type: none"> <li>a. Shop 1 of 2 grocery displays under cognitive load condition</li> <li>b. 5-minute break</li> <li>c. Shop same grocery display, under different cognitive load condition</li> </ul> </li> </ul>                                                                                                                                                                                                 |
| 6. 5-Minute break                        |                                                                                                                                                                                                                                                                                                                                                                                                                                                                                                                                |
| 7. Eight arithmetic tasks <sup>4</sup> : | <ul style="list-style-type: none"> <li>i. Section A (4 tasks)<sup>5</sup>:<br/>Multiply <math>m_1 \times m_2</math>, where integer <math>m_1 \sim U(13...19)</math> and integer <math>m_2 \sim U(5...9)</math></li> <li>ii. 5-minute break</li> <li>iii. Section B (4 tasks)<sup>6</sup>:<br/>Multiply <math>m_1 \times m_2</math>, where integer <math>m_1 \sim U(13...19)</math> and integer <math>m_2 \sim U(5...9)</math> concurrently with a memorization task (7-digit number recall at the end of each task)</li> </ul> |
| 8. Post-experiment questionnaire         |                                                                                                                                                                                                                                                                                                                                                                                                                                                                                                                                |
| 9. Receive study incentives:             | <ul style="list-style-type: none"> <li>i. \$5 USDs show-up payment</li> <li>ii. Receive food shopping task items (valued at \$10 USDs)<br/>1 of 2 tasks randomly selected</li> <li>iii. Memorization task payment (\$0-\$5 USDs)<br/>1 of 7 tasks randomly selected; receive additional \$5 USDs if correctly recalled 7-digit number, else receive additional \$0 USDs</li> <li>iv. Arithmetic Task payment (\$0-\$3 USDs)</li> </ul>                                                                                         |

|  |                                                                                                                             |
|--|-----------------------------------------------------------------------------------------------------------------------------|
|  | 1 of 8 tasks randomly selected; receive additional \$3 USDs if correctly answered problem, else receive additional \$0 USDs |
|--|-----------------------------------------------------------------------------------------------------------------------------|

---

<sup>1</sup>Memorization tasks served to induce high cognitive load

<sup>2</sup>Participants randomized to 1 of 2 grocery displays upon arrival and completed 2 shopping tasks: once under No Load and once under High Load; treatments can be viewed in TABLE 1.

<sup>3</sup>Presentation order of cognitive load conditions randomized within section

<sup>4</sup>Arithmetic performance serves as a manipulation check for high cognitive load, following Deck and Jahedi [22].

<sup>5</sup>Order of tasks randomized within section

<sup>6</sup>Half of participants randomly selected to complete Section B first; the 7-digit numbers employed were 4319162; 8568379; 5862413; 2856979
